# Supplementary material for: Tunneling effect in vitamin E recycling by green tea
Source: Royal Society of Chemistry journal article supplement (doi:10.1039/c6ra05986d), 2016-01-01

# Electronic Supplementary Information

## Tunneling Effect in Vitamin E Recycling by Green Tea

Shin-ichi Nagaoka,\* Akiko Nitta, Ai Suemitsu and Kazuo Mukai

*Department of Chemistry, Faculty of Science and Graduate School of Science and  
Engineering, Ehime University, Matsuyama 790-8577, Japan*

\*Corresponding author: Shin-ichi Nagaoka

e-mail: nagaoka@ehime-u.ac.jp

Phone: 81-89-927-9592

Fax: 81-89-927-9590

Table S1  $k_r^H$ ,  $k_r^D$ ,  $k_s^H$ ,  $k_s^D$ ,  $2k_d^H$  and  $2k_d^D$  values for reactions (1)–(3) in EtOH/H<sub>2</sub>O and EtOD/D<sub>2</sub>O at 15–37 °C.

Fig. S1 Rise-and-decay curves of [ $\alpha$ -Toc•] during reaction (2-H) and the subsequent reaction (3-H) in EtOH/H<sub>2</sub>O at 15–37 °C, and the curves simulated according to eqns (9)–(16).

Fig. S2 Rise-and-decay curves of [ $\alpha$ -Toc•] during reaction (2-D) and the subsequent reaction (3-D) in EtOD/D<sub>2</sub>O at 15–37 °C, and the curves simulated according to those similar to eqns (9)–(16).

Fig. S3 Arrhenius plots of  $k_s^H$  and  $k_s^D$  values for reactions (2-H) and (2-D) in EtOH/H<sub>2</sub>O and EtOD/D<sub>2</sub>O, respectively.

Fig. S4 Decay curves of  $\alpha$ -Toc• absorbance at 429 nm during reaction (3-D) and the competitive reaction (1-D) between  $\alpha$ -Toc• and EGC-D in EtOD/D<sub>2</sub>O at 25 °C.

Fig. S5 Decay curves of  $\alpha$ -Toc• absorbance at 429 nm during reaction (3-H) and the competitive reaction (1-H) between  $\alpha$ -Toc• and EC-H in EtOH/H<sub>2</sub>O at 25 °C.

Fig. S6 Decay curves of  $\alpha$ -Toc• absorbance at 429 nm during reaction (3-D) and the competitive reaction (1-D) between  $\alpha$ -Toc• and EC-D in EtOD/D<sub>2</sub>O at 25 °C.

Fig. S7 Decay curves of  $\alpha$ -Toc• absorbance at 429 nm during reaction (3-H) and the competitive reaction (1-H) between  $\alpha$ -Toc• and ECG-H in EtOH/H<sub>2</sub>O at 25 °C.

Fig. S8 Decay curves of  $\alpha$ -Toc• absorbance at 429 nm during reaction (3-H) and the competitive reaction (1-H) between  $\alpha$ -Toc• and EGCG-H in EtOH/H<sub>2</sub>O at 25 °C.

Fig. S9 Decay curves of  $\alpha$ -Toc• absorbance at 429 nm during reaction (3-D) and the competitive reaction (1-D) between  $\alpha$ -Toc• and EGCG-D in EtOD/D<sub>2</sub>O at 25 °C.

Fig. S10 Decay curves of  $\alpha$ -Toc• absorbance at 429 nm during reaction (3-H) and the competitive reaction (1-H) between  $\alpha$ -Toc• and MR in EtOH/H<sub>2</sub>O at 25 °C.

Fig. S11 Decay curves of  $\alpha$ -Toc• absorbance at 429 nm during reaction (3-H) and the competitive reaction (1-H) between  $\alpha$ -Toc• and MC in EtOH/H<sub>2</sub>O at 25 °C.

Fig. S12 Decay curves of  $\alpha$ -Toc• absorbance at 429 nm during reaction (3-H) and the competitive reaction (1-H) between  $\alpha$ -Toc• and MG in EtOH/H<sub>2</sub>O at 25 °C.

Fig. S13 Arrhenius plot of  $k_r^H$  values for reaction (1-H) between  $\alpha$ -Toc• and EC-H in EtOH/H<sub>2</sub>O.

Fig. S14 Arrhenius plot of  $k_r^H$  values for reaction (1-H) between  $\alpha$ -Toc• and ECG-H in EtOH/H<sub>2</sub>O.

Fig. S15 Arrhenius plot of  $k_r^H$  values for reaction (1-H) between  $\alpha$ -Toc• and EGCG-H in EtOH/H<sub>2</sub>O.

Fig. S16 Arrhenius plot of  $k_r^D$  values for reaction (1-D) between  $\alpha$ -Toc• and EGCG-D in EtOD/D<sub>2</sub>O.

Fig. S17 Arrhenius plot of  $k_r^H$  values for reaction (1-H) between  $\alpha$ -Toc• and MC in EtOH/H<sub>2</sub>O.

Fig. S18 Arrhenius plot of  $k_r^H$  values for reaction (1-H) between  $\alpha$ -Toc• and MG in EtOH/H<sub>2</sub>O.

**Table S1**  $k_r^H$ ,  $k_r^D$ ,  $k_s^H$ ,  $k_s^D$ ,  $2k_d^H$  and  $2k_d^D$  values for reactions (1)–(3) in EtOH/H<sub>2</sub>O and EtOD/D<sub>2</sub>O at 15–37 °C

| Molecule       |          | Reaction rate constant / M <sup>-1</sup> s <sup>-1</sup> |                    |                    |                    |                    |
|----------------|----------|----------------------------------------------------------|--------------------|--------------------|--------------------|--------------------|
|                |          | 15                                                       | 20                 | 25                 | 30                 | 37 / °C            |
| EC-H           | $k_r^H$  | $7.90 \times 10^2$                                       | $9.63 \times 10^2$ | $1.20 \times 10^3$ | $1.46 \times 10^3$ | $1.78 \times 10^3$ |
| EC-D           | $k_r^D$  | - <sup>a</sup>                                           | - <sup>a</sup>     | $2.56 \times 10^2$ | $3.28 \times 10^2$ | - <sup>a</sup>     |
| ECG-H          | $k_r^H$  | $2.38 \times 10^3$                                       | $2.84 \times 10^3$ | $3.43 \times 10^3$ | $4.18 \times 10^3$ | $5.22 \times 10^3$ |
| ECG-D          | $k_r^D$  | - <sup>a</sup>                                           | - <sup>a</sup>     | - <sup>a</sup>     | - <sup>a</sup>     | - <sup>a</sup>     |
| EGC-H          | $k_r^H$  | $2.00 \times 10^4$                                       | $2.24 \times 10^4$ | $2.41 \times 10^4$ | $2.71 \times 10^4$ | $2.98 \times 10^4$ |
| EGC-D          | $k_r^D$  | - <sup>a</sup>                                           | $2.23 \times 10^3$ | $2.49 \times 10^3$ | $3.00 \times 10^3$ | $3.74 \times 10^3$ |
| EGCG-H         | $k_r^H$  | $1.82 \times 10^4$                                       | $2.02 \times 10^4$ | $2.31 \times 10^4$ | $2.50 \times 10^4$ | $2.83 \times 10^4$ |
| EGCG-D         | $k_r^D$  | - <sup>a</sup>                                           | - <sup>a</sup>     | $4.49 \times 10^3$ | $5.30 \times 10^3$ | $6.89 \times 10^3$ |
| MR             | $k_r^H$  | $< 10^2$                                                 | $< 10^2$           | $< 10^2$           | $< 10^2$           | $< 10^2$           |
| MC             | $k_r^H$  | $3.30 \times 10^3$                                       | $3.96 \times 10^3$ | $4.48 \times 10^3$ | $5.38 \times 10^3$ | $6.32 \times 10^3$ |
| MP             | $k_r^H$  | $1.38 \times 10^5$                                       | $1.61 \times 10^5$ | $1.75 \times 10^5$ | $1.87 \times 10^5$ | $1.88 \times 10^5$ |
| MG             | $k_r^H$  | $1.47 \times 10^3$                                       | $1.78 \times 10^3$ | $2.11 \times 10^3$ | $2.46 \times 10^3$ | $3.06 \times 10^3$ |
| $\alpha$ -TocH | $k_s^H$  | $6.80 \times 10^3$                                       | $7.50 \times 10^3$ | $8.20 \times 10^3$ | $9.00 \times 10^3$ | $1.00 \times 10^4$ |
| $\alpha$ -TocD | $k_s^D$  | $2.70 \times 10^2$                                       | $3.20 \times 10^2$ | $4.00 \times 10^2$ | $4.55 \times 10^2$ | $5.45 \times 10^2$ |
| $\alpha$ -Toc• | $2k_d^H$ | $1.08 \times 10^3$                                       | $1.13 \times 10^3$ | $1.21 \times 10^3$ | $1.25 \times 10^3$ | $1.40 \times 10^3$ |
| $\alpha$ -Toc• | $2k_d^D$ | $8.80 \times 10^2$                                       | $8.90 \times 10^2$ | $9.50 \times 10^2$ | $1.01 \times 10^3$ | $1.15 \times 10^3$ |

<sup>a</sup> Reliable data was not obtained.

**Fig. S1** Rise-and-decay curves of  $[\alpha\text{-Toc}\cdot]$  during reaction (2-H) and the subsequent reaction (3-H) in EtOH/H<sub>2</sub>O at 15–37 °C (red curves), and the curves simulated according to eqns (9)–(16) (black curves). In the simulation,  $k_s^H$  and  $2k_d^H$  are set to the values given in Table S1, and  $[\text{ArO}\cdot]_0$  are set to  $7.50\times 10^{-2}$ ,  $7.60\times 10^{-2}$ ,  $7.85\times 10^{-2}$ ,  $8.15\times 10^{-2}$  and  $8.46\times 10^{-2}$  mM at 15, 20, 25, 30 and 37 °C, respectively.  $[\alpha\text{-TocH}]_0 = 6.33$  mM and  $\varepsilon = 3420$  M<sup>-1</sup>cm<sup>-1</sup>.

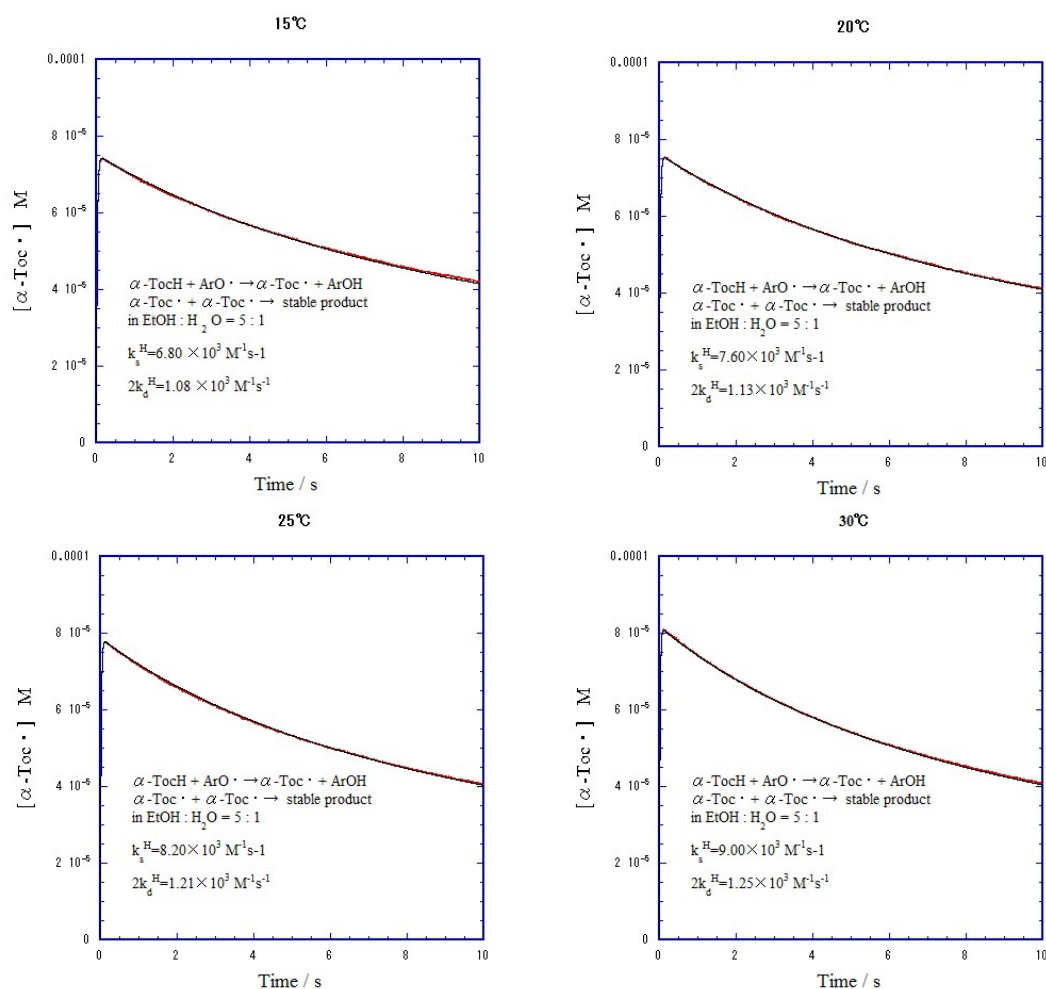

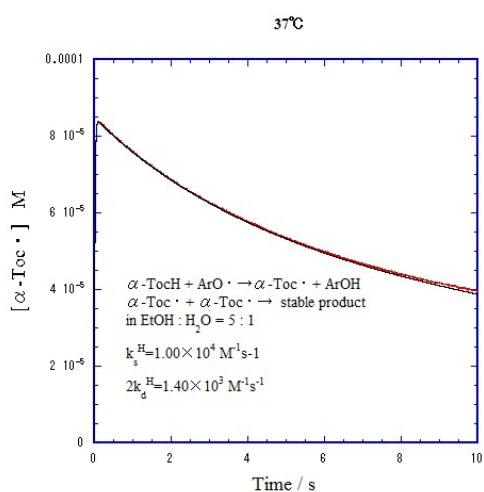

**Fig. S2** Rise-and-decay curves of  $[\alpha\text{-Toc}\cdot]$  during reaction (2-D) and the subsequent reaction (3-D) in EtOD/D<sub>2</sub>O at 15–37 °C (red curves), and the curves simulated according to those similar to eqns (9)–(16) (blue curves). In the simulation,  $k_s^D$  and  $2k_d^D$  are set to the values given in Table S1, and  $[\text{ArO}\cdot]_0$  are set to 0.255, 0.240, 0.230, 0.218 and 0.215 mM at 15, 20, 25, 30 and 37 °C, respectively.  $[\alpha\text{-TocD}]_0 = 2.12$  mM and  $\varepsilon = 3420$  M<sup>-1</sup>cm<sup>-1</sup>.

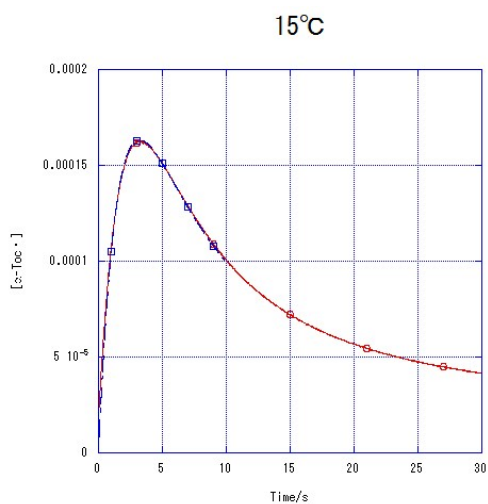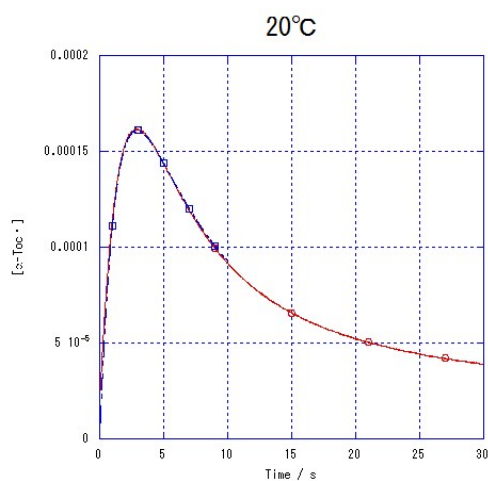

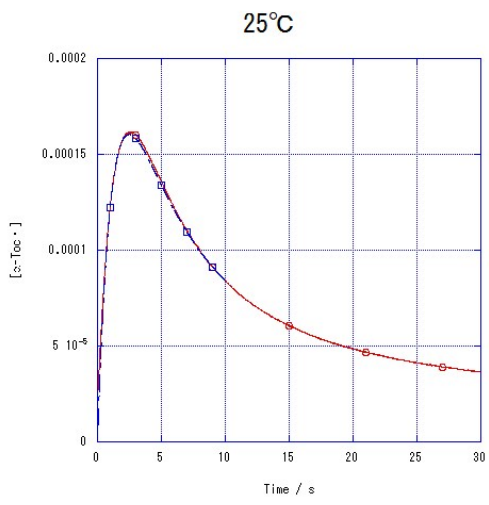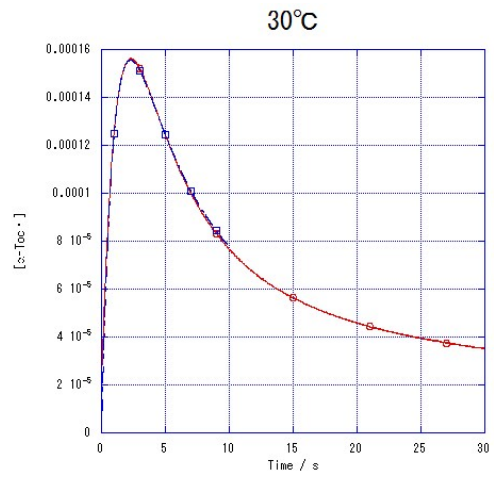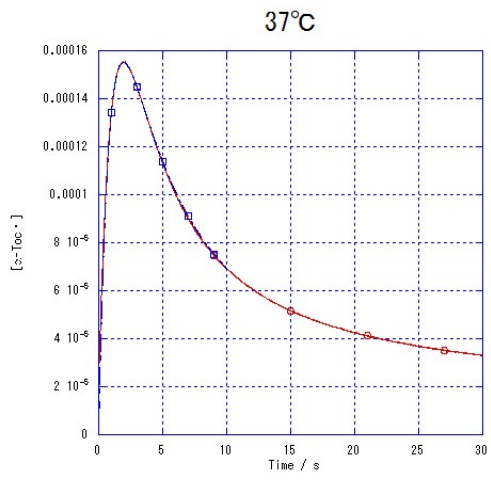

**Fig. S3** Arrhenius plots of  $k_s^H$  and  $k_s^D$  values for reactions (2-H) and (2-D) in EtOH/H<sub>2</sub>O and EtOD/D<sub>2</sub>O (open and filled circles, respectively). The solid lines show the best-fitting lines by standard linear least-squares analyses.

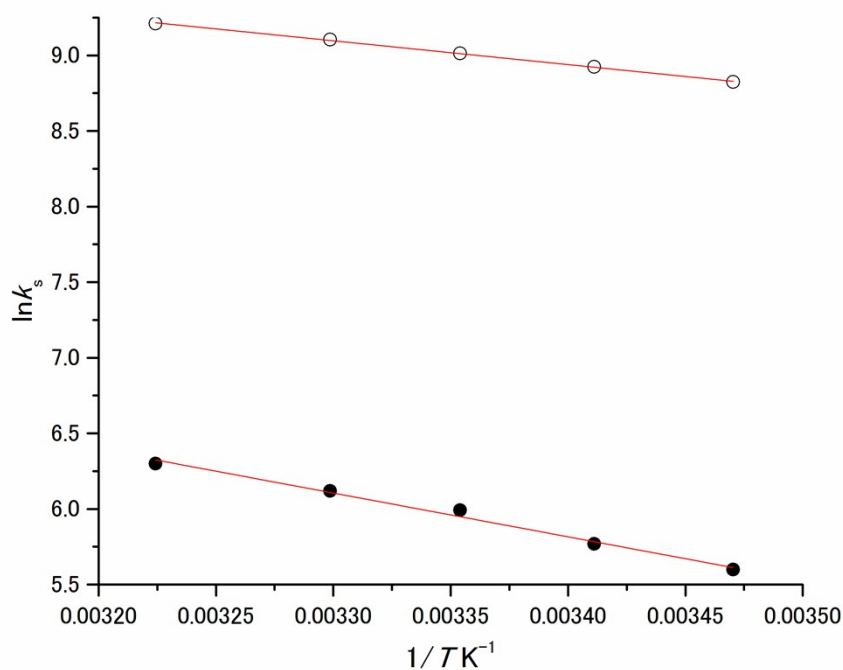

**Fig. S4** Decay curves of  $\alpha$ -Toc• absorbance at 429 nm during reaction (3-D) and the competitive reaction (1-D) between  $\alpha$ -Toc• and EGC-D in EtOD/D<sub>2</sub>O at 25 °C. The prepared [EGC-D] for the data shown with red, blue, green and black curves were  $3.96 \times 10^{-5}$ ,  $7.92 \times 10^{-5}$ ,  $1.19 \times 10^{-4}$  and  $1.58 \times 10^{-4}$  M, respectively.

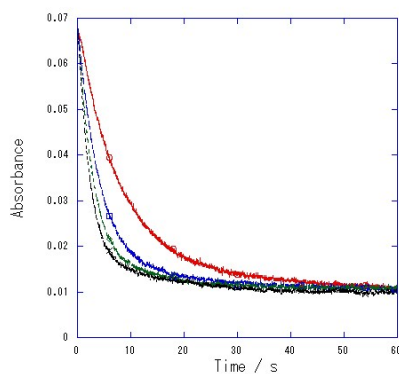

**Fig. S5** Decay curves of  $\alpha$ -Toc• absorbance at 429 nm during reaction (3-H) and the competitive reaction (1-H) between  $\alpha$ -Toc• and EC-H in EtOH/H<sub>2</sub>O at 25 °C. The prepared [EC-H] for the data shown with black, dark-grey, red and light-gray curves were  $3.57 \times 10^{-4}$ ,  $7.14 \times 10^{-4}$ ,  $1.07 \times 10^{-3}$  and  $1.43 \times 10^{-3}$  M, respectively.

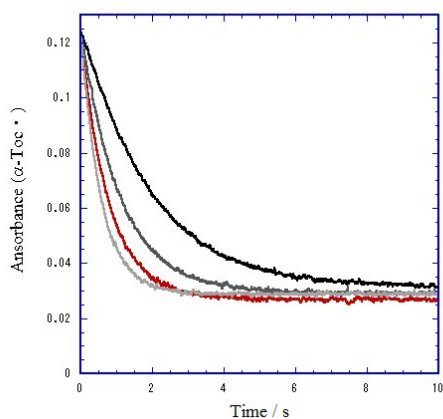

**Fig. S6** Decay curves of  $\alpha$ -Toc• absorbance at 429 nm during reaction (3-D) and the competitive reaction (1-D) between  $\alpha$ -Toc• and EC-D in EtOD/D<sub>2</sub>O at 25 °C. The prepared [EC-D] for the data shown with red, blue, green and black curves were  $3.44 \times 10^{-4}$ ,  $6.88 \times 10^{-4}$ ,  $1.03 \times 10^{-3}$  and  $1.38 \times 10^{-3}$  M, respectively.

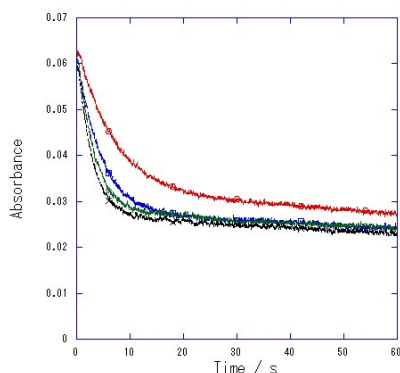



**Fig. S7** Decay curves of  $\alpha$ -Toc• absorbance at 429 nm during reaction (3-H) and the competitive reaction (1-H) between  $\alpha$ -Toc• and ECG-H in EtOH/H<sub>2</sub>O at 25 °C. The prepared [ECG-H] for the data shown with black, dark-grey, red and light-gray curves were  $3.84 \times 10^{-5}$ ,  $7.69 \times 10^{-5}$ ,  $1.15 \times 10^{-4}$  and  $1.53 \times 10^{-4}$  M, respectively.

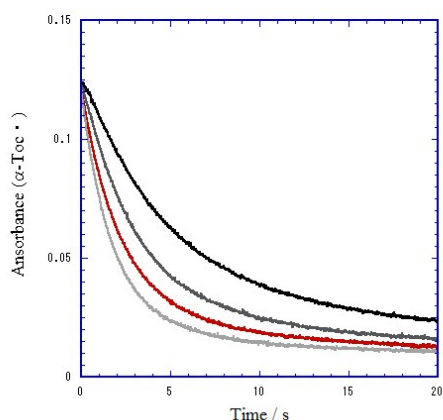

**Fig. S8** Decay curves of  $\alpha$ -Toc• absorbance at 429 nm during reaction (3-H) and the competitive reaction (1-H) between  $\alpha$ -Toc• and EGCG-H in EtOH/H<sub>2</sub>O at 25 °C. The prepared [EGCG-H] for the data shown with black, dark-grey, red and light-gray curves were  $1.79 \times 10^{-5}$ ,  $3.58 \times 10^{-5}$ ,  $5.38 \times 10^{-5}$  and  $7.17 \times 10^{-5}$  M, respectively.

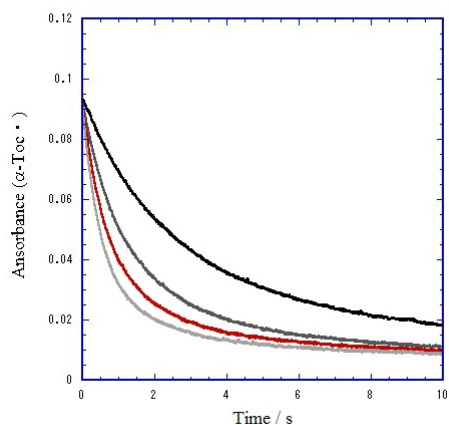

**Fig. S9** Decay curves of  $\alpha$ -Toc $\cdot$  absorbance at 429 nm during reaction (3-D) and the competitive reaction (1-D) between  $\alpha$ -Toc $\cdot$  and EGCG-D in EtOD/D<sub>2</sub>O at 25 °C. The prepared [EGCG-D] for the data shown with red, blue, green and black curves were  $3.20 \times 10^{-5}$ ,  $6.39 \times 10^{-5}$ ,  $9.56 \times 10^{-5}$  and  $1.28 \times 10^{-4}$  M, respectively.

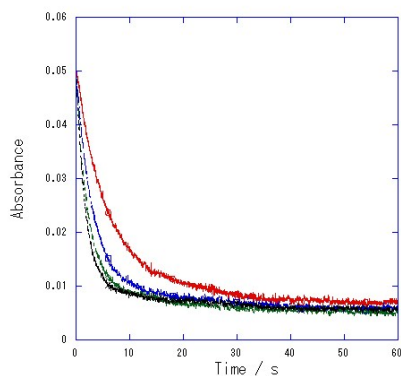

**Fig. S10** Decay curves of  $\alpha$ -Toc $\cdot$  absorbance at 429 nm during reaction (3-H) and the competitive reaction (1-H) between  $\alpha$ -Toc $\cdot$  and MR in EtOH/H<sub>2</sub>O at 25 °C. The prepared [MR] for the data shown with black, dark-grey, red and light-gray curves were  $9.18 \times 10^{-4}$ ,  $1.84 \times 10^{-3}$ ,  $2.75 \times 10^{-3}$  and  $3.67 \times 10^{-3}$  M, respectively.

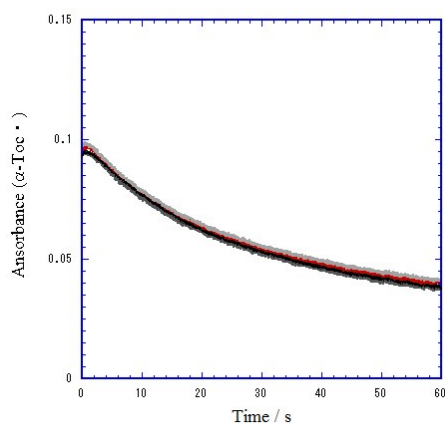

**Fig. S11** Decay curves of  $\alpha$ -Toc• absorbance at 429 nm during reaction (3-H) and the competitive reaction (1-H) between  $\alpha$ -Toc• and MC in EtOH/H<sub>2</sub>O at 25 °C. The prepared [MC] for the data shown with black, dark-grey, red and light-gray curves were  $1.07 \times 10^{-3}$ ,  $2.14 \times 10^{-3}$ ,  $3.20 \times 10^{-3}$  and  $4.27 \times 10^{-3}$  M, respectively.

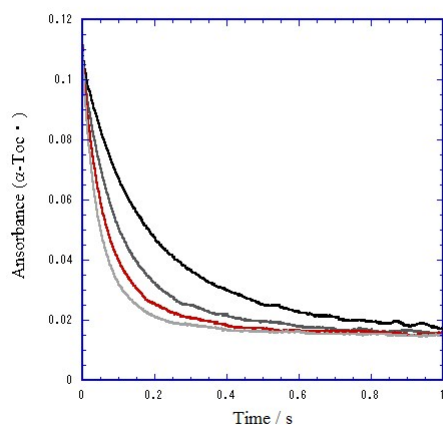

**Fig. S12** Decay curves of  $\alpha$ -Toc• absorbance at 429 nm during reaction (3-H) and the competitive reaction (1-H) with MG in EtOH/H<sub>2</sub>O at 25 °C. The prepared [MG] for the data shown with black, dark-grey, red and light-gray curves were  $6.44 \times 10^{-4}$ ,  $1.29 \times 10^{-3}$ ,  $1.93 \times 10^{-3}$  and  $2.58 \times 10^{-3}$  M, respectively.

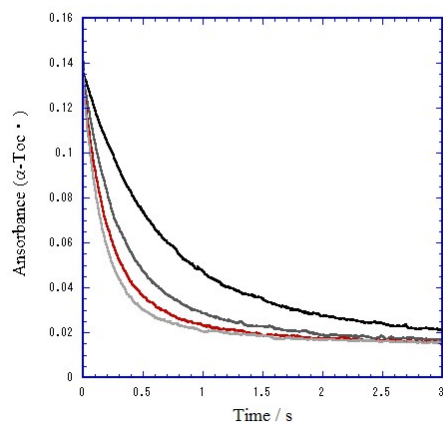

**Fig. S13** Arrhenius plot of  $k_r^H$  values for reaction (1-H) between  $\alpha$ -Toc• and EC-H in EtOH/H<sub>2</sub>O. The solid line shows the best-fitting line by a standard linear least-squares analysis.

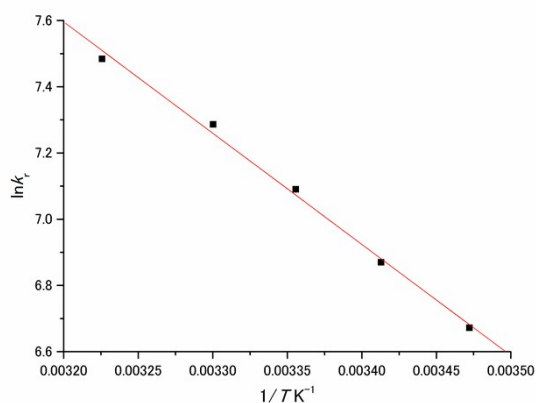

**Fig. S14** Arrhenius plot of  $k_r^H$  values for reaction (1-H) between  $\alpha$ -Toc• and ECG-H in EtOH/H<sub>2</sub>O. The solid line shows the best-fitting line by a standard linear least-squares analysis.

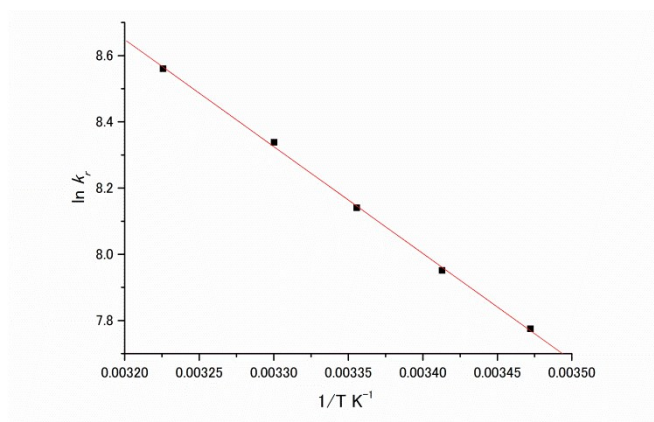

**Fig. S15** Arrhenius plot of  $k_r^H$  values for reaction (1-H) between  $\alpha$ -Toc• and EGCG-H in EtOH/H<sub>2</sub>O. The solid line shows the best-fitting line by a standard linear least-squares analysis.

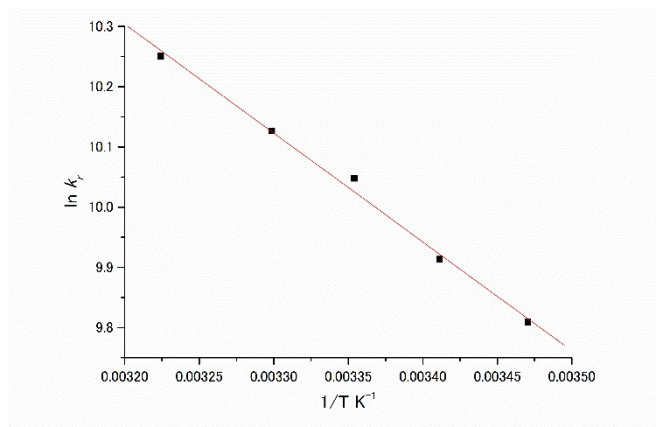

**Fig. S16** Arrhenius plot of  $k_r^D$  values for reaction (1-D) between  $\alpha$ -Toc• and EGCG-D in EtOD/D<sub>2</sub>O. The solid line shows the best-fitting line by a standard linear least-squares analysis.

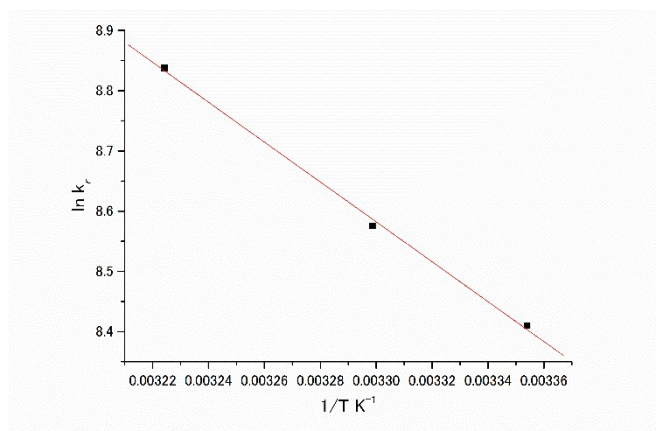

**Fig. S17** Arrhenius plot of  $k_r^H$  values for reaction (1-H) with MC in EtOH/H<sub>2</sub>O. The solid line shows the best-fitting line by a standard linear least-squares analysis.

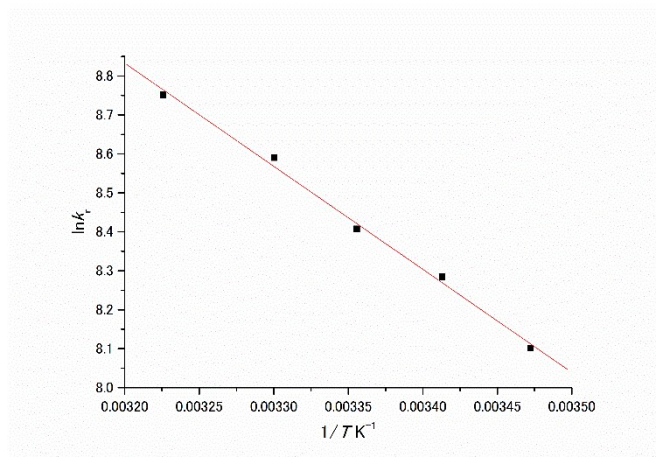

**Fig. S18** Arrhenius plot of  $k_r^H$  values for reaction (1-H) with MG in EtOH/H<sub>2</sub>O. The solid line shows the best-fitting line by a standard linear least-squares analysis.

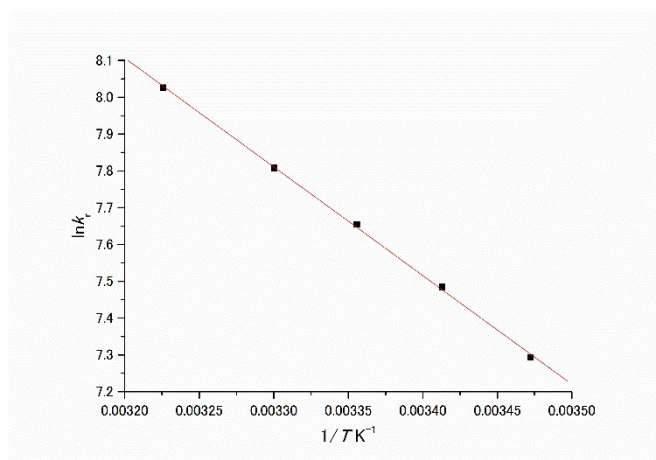

Supplement: c6ra05986d1.pdf [file c6ra05986d1.pdf]
